# Supplementary material for: Antiglycoxidative Properties of Extracts and Fractions from Reynoutria Rhizomes
Source: MDPI journal article supplement (doi:10.3390/nu13114066), 2021-11-14
Supplement: s1 [file s1]

Tukey's multiple comparisons test

\* Statistically significant at  $p \leq 0.05$ , \*\* for  $p \leq 0.01$ , \*\*\* for  $p \leq 0.001$ , \*\*\*\* for  $p \leq 0.0001$ , ns-not statistically significant at  $p \leq 0.05$

|                                       | BSA<br>fructosamine | HSA<br>fructosamine | BSA<br>AGE | HSA<br>AGE | BSA<br>carbonyl<br>group | HSA<br>carbonyl<br>group | BSA<br>thiol<br>group | HSA<br>thiol<br>group | BSA<br>Thioflavin<br>T - $\beta$<br>amyloid | HSA<br>Thioflavin<br>T - $\beta$<br>amyloid | BSA<br>Congo<br>red - $\beta$<br>amyloid | HSA<br>Congo<br>red - $\beta$<br>amyloid |
|---------------------------------------|---------------------|---------------------|------------|------------|--------------------------|--------------------------|-----------------------|-----------------------|---------------------------------------------|---------------------------------------------|------------------------------------------|------------------------------------------|
| CONTROL - VS.<br>CONTROL +            | ****                | ****                | ****       | ****       | ****                     | ****                     | ****                  | ****                  | ****                                        | ****                                        | ****                                     | ****                                     |
| CONTROL - VS. R.J.<br>ACETONE         | ****                | ****                | ****       | ****       | **                       | ns                       | ****                  | ****                  | ****                                        | ns                                          | ****                                     | ns                                       |
| CONTROL - VS. R.J.<br>DICHLOROMETHANE | ****                | ****                | ****       | ****       | ****                     | ****                     | ****                  | ****                  | ****                                        | **                                          | ****                                     | ****                                     |
| CONTROL - VS. R.J.<br>DIETHYL ETHER   | ****                | ****                | ****       | ****       | ns                       | ****                     | ****                  | ****                  | ****                                        | *                                           | ****                                     | ****                                     |
| CONTROL - VS. R.J.<br>ETHYL ACETATE   | ****                | ****                | ****       | ****       | ****                     | ns                       | ****                  | ****                  | ****                                        | ***                                         | ****                                     | ns                                       |
| CONTROL - VS. R.J.<br>BUTANOL         | ****                | ****                | ****       | ****       | ****                     | ****                     | ****                  | ****                  | ****                                        | ns                                          | ****                                     | ****                                     |
| CONTROL - VS. R.S.<br>ACETONE         | ****                | ****                | ****       | ****       | **                       | ****                     | ****                  | ****                  | ****                                        | **                                          | ****                                     | ns                                       |
| CONTROL - VS. R.S.<br>DICHLOROMETHANE | ****                | ****                | ****       | ****       | ****                     | ****                     | ****                  | ****                  | ****                                        | ****                                        | ****                                     | ****                                     |
| CONTROL - VS. R.S.<br>DIETHYL ETHER   | ****                | ****                | ****       | ****       | ****                     | ****                     | ****                  | ****                  | ****                                        | ns                                          | ****                                     | ns                                       |
| CONTROL - VS. R.S.<br>ETHYL ACETATE   | ****                | ns                  | ****       | ***        | ns                       | **                       | ****                  | ****                  | ****                                        | ***                                         | ****                                     | ns                                       |
| CONTROL - VS. R.S.<br>BUTANOL         | ****                | ****                | ****       | ****       | ****                     | ****                     | ****                  | ****                  | ****                                        | ns                                          | ****                                     | **                                       |



[illegible]

|                                                      |      |      |      |      |      |      |      |      |      |      |      |      |
|------------------------------------------------------|------|------|------|------|------|------|------|------|------|------|------|------|
| R.J. ACETONE VS. R.S.<br>DIETHYL ETHER               | **** | **** | **** | **   | **** | **** | **** | **** | **** | ns   | **** | ns   |
| R.J. ACETONE VS. R.S.<br>ETHYL ACETATE               | **** | **** | **** | **** | ns   | ns   | **** | **** | **** | ns   | **** | ns   |
| R.J. ACETONE VS. R.S.<br>BUTANOL                     | **** | **** | **** | **** | **** | **** | **** | **** | **** | ***  | **** | ns   |
| R.J. ACETONE VS. R. X<br>B. ACETONE                  | **** | ns   | **** | ns   | **** | ns   | **** | **** | **** | ns   | **** | ns   |
| R.J. ACETONE VS. R. X<br>B.<br>DICHLOROMETHANE       | **** | **** | **** | **** | **** | **** | **** | **** | **** | **   | **** | *    |
| R.J. ACETONE VS. R. X<br>B. DIETHYL ETHER            | ns   | ns   | **** | **** | **** | ***  | **** | **** | **** | ns   | **** | ns   |
| R.J. ACETONE VS. R. X<br>B. ETHYL ACETATE            | **** | **** | **** | **** | **** | ns   | **** | **** | **** | ns   | **** | ns   |
| R.J. ACETONE VS. R. X<br>B. BUTANOL                  | **** | **** | **** | **** | **** | **** | **** | **** | ns   | ns   | **** | ns   |
| R.J. ACETONE VS.<br>RESVERATROL                      | **** | **** | **** | **** | ns   | **** | **** | **** | **** | *    | **** | ns   |
| R.J. ACETONE VS.<br>AMINOGUANIDINE                   | **** | **** | **** | **** | **   | **** | **** | *    | **** | ns   | **** | ns   |
| R.J.<br>DICHLOROMETHANE<br>VS. R.J. DIETHYL<br>ETHER | **** | **** | **** | **** | **** | **** | **** | ns   | **** | ns   | **** | *    |
| R.J.<br>DICHLOROMETHANE<br>VS. R.J. ETHYL<br>ACETATE | **** | **** | **** | **** | **** | **** | **** | **** | **** | **** | **** | **** |
| R.J.<br>DICHLOROMETHANE<br>VS. R.J. BUTANOL          | **** | **** | **** | ns   | **** | **   | **** | ns   | **** | ***  | **** | ns   |

[illegible]

|                                                   |      |      |      |      |      |      |      |      |      |      |      |      |
|---------------------------------------------------|------|------|------|------|------|------|------|------|------|------|------|------|
| VS. R. X B. ETHYL<br>ACETATE                      |      |      |      |      |      |      |      |      |      |      |      |      |
| R.J.<br>DICHLOROMETHANE<br>VS. R. X B. BUTANOL    | **** | **** | **** | ns   | **** | ns   | **** | ns   | **** | **** | **** | **** |
| R.J.<br>DICHLOROMETHANE<br>VS. RESVERATROL        | **** | **** | **** | **** | **** | **** | **** | **** | **** | **** | **** | **** |
| R.J.<br>DICHLOROMETHANE<br>VS.<br>AMINOGUANIDINE  | **** | **** | **** | **** | **** | **** | **** | **** | **** | **** | **** | **** |
| R.J. DIETHYL ETHER<br>VS. R.J. ETHYL<br>ACETATE   | **** | **** | **** | **** | **** | **   | **** | **** | **** | **** | **** | ***  |
| R.J. DIETHYL ETHER<br>VS. R.J. BUTANOL            | **   | **** | **** | **** | **** | **   | **** | **** | **** | **   | **** | ns   |
| R.J. DIETHYL ETHER<br>VS. R.S. ACETONE            | **** | **** | **** | **** | *    | ns   | **** | **** | **** | **** | **** | **** |
| R.J. DIETHYL ETHER<br>VS. R.S.<br>DICHLOROMETHANE | **** | **** | **** | **** | **** | **** | **** | **** | **** | ns   | ***  | ns   |
| R.J. DIETHYL ETHER<br>VS. R.S. DIETHYL<br>ETHER   | **** | **** | **** | **** | **** | **** | **** | ns   | **** | **** | **** | *    |
| R.J. DIETHYL ETHER<br>VS. R.S. ETHYL<br>ACETATE   | **** | **** | **** | **** | *    | ns   | **** | **** | **** | **** | **** | ***  |
| R.J. DIETHYL ETHER<br>VS. R.S. BUTANOL            | **** | **** | **** | **** | **** | **** | **** | **** | **** | ns   | **** | ns   |

|                                                      |      |      |      |      |      |      |      |      |      |      |      |      |
|------------------------------------------------------|------|------|------|------|------|------|------|------|------|------|------|------|
| R.J. DIETHYL ETHER<br>VS. R. X B. ACETONE            | **** | **** | **** | **** | **** | ns   | **** | **** | **** | **** | **** | **** |
| R.J. DIETHYL ETHER<br>VS. R. X B.<br>DICHLOROMETHANE | **** | **** | **** | **** | **** | **** | **** | **** | **** | ns   | **** | ns   |
| R.J. DIETHYL ETHER<br>VS. R. X B. DIETHYL<br>ETHER   | **** | **** | **** | **** | **** | ns   | **** | ns   | **** | **** | **** | **** |
| R.J. DIETHYL ETHER<br>VS. R. X B. ETHYL<br>ACETATE   | **** | **** | **** | **** | ns   | ns   | **** | **** | **** | **** | **** | **** |
| R.J. DIETHYL ETHER<br>VS. R. X B. BUTANOL            | ns   | **   | **** | ns   | **** | **** | **** | *    | **** | **** | **** | ns   |
| R.J. DIETHYL ETHER<br>VS. RESVERATROL                | **** | **** | **** | **** | **** | **** | **** | **** | **** | **** | **** | **** |
| R.J. DIETHYL ETHER<br>VS.<br>AMINOGUANIDINE          | **** | **** | **** | **** | **** | **** | **** | **** | **** | **** | **** | **** |
| R.J. ETHYL ACETATE<br>VS. R.J. BUTANOL               | **** | **** | **** | **** | **** | **** | **** | **** | **** | **   | **** | **   |
| R.J. ETHYL ACETATE<br>VS. R.S. ACETONE               | **** | **** | **** | *    | **** | **** | **** | **** | ns   | ns   | **** | ns   |
| R.J. ETHYL ACETATE<br>VS. R.S.<br>DICHLOROMETHANE    | ns   | **** | **** | **** | **** | **** | **** | **** | **** | **** | **** | **   |
| R.J. ETHYL ACETATE<br>VS. R.S. DIETHYL<br>ETHER      | **** | **** | **** | ns   | **** | **** | **** | **** | ns   | ns   | **** | ns   |
| R.J. ETHYL ACETATE<br>VS. R.S. ETHYL<br>ACETATE      | **** | **** | **** | *    | ns   | ns   | **** | **** | ns   | ns   | **** | ns   |

|                                                      |      |      |      |      |      |      |      |      |      |      |      |      |
|------------------------------------------------------|------|------|------|------|------|------|------|------|------|------|------|------|
| R.J. ETHYL ACETATE<br>VS. R.S. BUTANOL               | **   | **** | **** | **** | **** | **** | **** | **** | **** | **** | **** | ns   |
| R.J. ETHYL ACETATE<br>VS. R. X B. ACETONE            | ns   | **** | **** | ns   | **** | ***  | **** | **** | **** | ns   | **** | ns   |
| R.J. ETHYL ACETATE<br>VS. R. X B.<br>DICHLOROMETHANE | **** | **** | **** | **** | **** | **** | **** | **** | **** | **** | **** | ns   |
| R.J. ETHYL ACETATE<br>VS. R. X B. DIETHYL<br>ETHER   | ns   | **** | **** | **** | **** | **** | **** | **** | **** | ns   | **** | ns   |
| R.J. ETHYL ACETATE<br>VS. R. X B. ETHYL<br>ACETATE   | **** | ns   | **** | **   | **** | ns   | **** | **** | **** | ns   | **** | **   |
| R.J. ETHYL ACETATE<br>VS. R. X B. BUTANOL            | **** | **** | **** | **** | **** | **** | **** | **** | **** | ns   | **** | ns   |
| R.J. ETHYL ACETATE<br>VS. RESVERATROL                | **** | **** | **** | **** | ns   | **** | **** | **** | **** | ns   | **** | ns   |
| R.J. ETHYL ACETATE<br>VS.<br>AMINOGUANIDINE          | **** | **** | **** | **   | ns   | ns   | **** | **** | **** | ns   | **** | *    |
| R.J. BUTANOL VS. R.S.<br>ACETONE                     | **** | **** | **** | **** | **** | ns   | **** | **** | **** | ns   | **** | **** |
| R.J. BUTANOL VS. R.S.<br>DICHLOROMETHANE             | **** | **** | **** | **   | *    | **** | **** | ns   | **** | **** | **** | ns   |
| R.J. BUTANOL VS. R.S.<br>DIETHYL ETHER               | **** | **** | **** | **** | **** | ns   | ns   | ns   | **** | ns   | **** | **   |
| R.J. BUTANOL VS. R.S.<br>ETHYL ACETATE               | **** | **** | **** | **** | **** | **** | **** | **** | **** | **   | **** | **** |
| R.J. BUTANOL VS. R.S.<br>BUTANOL                     | **** | ***  | **** | *    | ns   | **** | **   | ns   | **** | ns   | **** | ns   |



|                                                |      |      |      |      |      |      |      |      |      |      |      |      |
|------------------------------------------------|------|------|------|------|------|------|------|------|------|------|------|------|
| R.J. BUTANOL VS. R. X<br>B. ACETONE            | **** | **** | **** | **** | **** | *    | **** | **** | **** | ns   | **** | **** |
| R.J. BUTANOL VS. R. X<br>B.<br>DICHLOROMETHANE | **** | **** | **** | ns   | **** | **** | *    | ns   | **** | ns   | **** | ns   |
| R.J. BUTANOL VS. R. X<br>B. DIETHYL ETHER      | **** | **** | **** | *    | **** | ns   | **** | **** | **** | ns   | **** | **** |
| R.J. BUTANOL VS. R. X<br>B. ETHYL ACETATE      | **** | **** | **** | **** | **** | **** | **** | **** | **** | **** | **** | **** |
| R.J. BUTANOL VS. R. X<br>B. BUTANOL            | **   | **** | **** | **** | **** | **** | ns   | ns   | **** | ns   | **** | *    |
| R.J. BUTANOL VS.<br>RESVERATROL                | **** | **** | **** | **** | **** | **** | **** | **** | **** | **** | **** | **** |
| R.J. BUTANOL VS.<br>AMINOGUANIDINE             | **** | **** | **** | **** | **** | **** | **** | **** | **** | ***  | **** | **** |
| R.S. ACETONE VS. R.S.<br>DICHLOROMETHANE       | **** | **** | **** | **** | **** | **** | **** | **** | **** | **** | **** | **** |
| R.S. ACETONE VS. R.S.<br>DIETHYL ETHER         | ns   | **** | **** | ns   | ns   | *    | **** | **** | ns   | ns   | **** | ns   |
| R.S. ACETONE VS. R.S.<br>ETHYL ACETATE         | **** | **** | ns   | ns   | **** | ns   | **** | **** | ns   | ns   | *    | ns   |
| R.S. ACETONE VS. R.S.<br>BUTANOL               | **** | **** | **** | **** | **** | **** | ns   | **** | **** | **** | **** | ns   |
| R.S. ACETONE VS. R. X<br>B. ACETONE            | **** | **** | **** | *    | ns   | ns   | **** | **** | **** | ns   | **** | ns   |
| R.S. ACETONE VS. R. X<br>B.<br>DICHLOROMETHANE | **** | **** | **** | **** | **** | **** | **** | **** | **** | **** | **** | *    |
| R.S. ACETONE VS. R. X<br>B. DIETHYL ETHER      | **** | **** | **** | **** | ns   | ns   | **** | ***  | **** | ns   | **** | ns   |
| R.S. ACETONE VS. R. X<br>B. ETHYL ACETATE      | ns   | ***  | **   | ns   | ns   | ns   | ns   | **** | **** | ns   | **** | ns   |

[illegible]

|                                                      |      |      |      |      |      |      |      |      |      |      |      |      |
|------------------------------------------------------|------|------|------|------|------|------|------|------|------|------|------|------|
| R.S.<br>DICHLOROMETHANE<br>VS. R. X B. BUTANOL       | **** | **** | **** | **** | **** | ns   | **** | **   | **** | **** | **** | *    |
| R.S.<br>DICHLOROMETHANE<br>VS. RESVERATROL           | **** | **** | **** | **** | **** | **** | **** | **** | **** | **** | **** | **** |
| R.S.<br>DICHLOROMETHANE<br>VS.<br>AMINOGUANIDINE     | **** | **** | **** | **** | **** | **** | **** | **** | **** | **** | **** | **** |
| R.S. DIETHYL ETHER<br>VS. R.S. ETHYL<br>ACETATE      | **** | **** | **** | ns   | **** | **** | **** | **** | ns   | ns   | **** | ns   |
| R.S. DIETHYL ETHER<br>VS. R.S. BUTANOL               | **** | **** | **** | **** | **** | **** | **** | ns   | **** | **** | **** | ns   |
| R.S. DIETHYL ETHER<br>VS. R. X B. ACETONE            | **** | **** | **** | ns   | ns   | ***  | **** | **** | **   | ns   | **** | ns   |
| R.S. DIETHYL ETHER<br>VS. R. X B.<br>DICHLOROMETHANE | **** | **** | **** | **** | **   | **** | ns   | ns   | **** | **   | **** | ns   |
| R.S. DIETHYL ETHER<br>VS. R. X B. DIETHYL<br>ETHER   | **** | **** | **** | **** | ns   | ns   | **** | ***  | **** | ns   | **** | ns   |
| R.S. DIETHYL ETHER<br>VS. R. X B. ETHYL<br>ACETATE   | ns   | **** | **   | ns   | **   | **** | **** | **** | **** | ns   | **** | *    |
| R.S. DIETHYL ETHER<br>VS. R. X B. BUTANOL            | **** | **** | **** | **** | ns   | *    | ns   | ns   | **** | ns   | **** | ns   |
| R.S. DIETHYL ETHER<br>VS. RESVERATROL                | **** | **** | **** | **   | **** | **** | **** | **** | **** | ns   | **** | ns   |
| R.S. DIETHYL ETHER<br>VS.<br>AMINOGUANIDINE          | ns   | **** | **** | ns   | **** | **** | **** | **** | **** | ns   | **** | ns   |





|                                                       |      |      |      |      |      |      |      |      |      |    |      |     |
|-------------------------------------------------------|------|------|------|------|------|------|------|------|------|----|------|-----|
| VS.<br>AMINOGUANIDINE                                 |      |      |      |      |      |      |      |      |      |    |      |     |
| R. X B. DIETHYL<br>ETHER VS. R. X B.<br>ETHYL ACETATE | **** | **** | **** | **** | **   | ns   | **** | **** | **** | *  | **** | ns  |
| R. X B. DIETHYL<br>ETHER VS. R. X B.<br>BUTANOL       | **** | **** | **** | *    | ns   | **** | **** | **** | **** | ns | **** | ns  |
| R. X B. DIETHYL<br>ETHER VS.<br>RESVERATROL           | **** | **** | **** | **** | **** | **** | **** | **** | **** | ** | **** | ns  |
| R. X B. DIETHYL<br>ETHER VS.<br>AMINOGUANIDINE        | **** | **** | **** | **** | **** | **** | **** | **** | **** | ns | **** | ns  |
| R. X B. ETHYL<br>ACETATE VS. R. X B.<br>BUTANOL       | **** | **** | **** | **** | **** | **** | **** | **** | **** | *  | **** | *** |
| R. X B. ETHYL<br>ACETATE VS.<br>RESVERATROL           | **** | **** | **** | ns   | **** | **** | **** | **** | **   | ns | **** | ns  |
| R. X B. ETHYL<br>ACETATE VS.<br>AMINOGUANIDINE        | ns   | **** | **** | ns   | **** | **** | **** | **** | ns   | ns | ns   | ns  |
| R. X B. BUTANOL VS.<br>RESVERATROL                    | **** | **** | **** | **** | **** | **** | **** | **** | **** | ** | **** | *   |
| R. X B. BUTANOL VS.<br>AMINOGUANIDINE                 | **** | **** | **** | **** | **** | **** | **** | **** | **** | ns | **** | **  |
| RESVERATROL VS.<br>AMINOGUANIDINE                     | **** | **** | **** | ns   | **** | ns   | **** | **** | **   | ns | **** | ns  |
